# Supplementary material for: Psychosocial characteristics and quality of life among sexual and gender minority patients with cancer
Source: PubMed Central journal article supplement — JNCI Cancer Spectr. 2023 Aug 12;7(5):pkad061. doi: 10.1093/jncics/pkad061 (PMC10587999; doi:10.1093/jncics/pkad061), 2023-08-12
Supplement: pkad061_supplementary_data.pdf [file pkad061_supplementary_data.pdf]

Supplementary Table 1. Psychosocial concerns and quality of life among sexual minority patients vs non-SGM patients.

| <b>Variable</b>                                                                                                      | <b>SM patients<sup>a</sup><br/>(n=1,356)</b> | <b>Non- SGM<br/>patients<br/>(n=50,116)</b> | <b>p-value</b> |
|----------------------------------------------------------------------------------------------------------------------|----------------------------------------------|---------------------------------------------|----------------|
| <b>Psychosocial concerns</b>                                                                                         |                                              |                                             |                |
| <b>Have a family member or friend who can help during my illness and treatment (n, %)</b>                            |                                              |                                             | .001           |
| Yes                                                                                                                  | 1,297 (95.6%)                                | 48,782 (97.3%)                              |                |
| No                                                                                                                   | 59 (4.4%)                                    | 1,324 (2.6%)                                |                |
| No response                                                                                                          | 0 (0.0%)                                     | 10 (0.0%)                                   |                |
| <b>Living alone (n, %)</b>                                                                                           |                                              |                                             | <.001          |
| Yes                                                                                                                  | 259 (19.1%)                                  | 6,921 (13.8%)                               |                |
| No                                                                                                                   | 1,097 (80.9%)                                | 43,185 (86.2%)                              |                |
| No response                                                                                                          | 0 (0.0%)                                     | 10 (0.0%)                                   |                |
| <b>Considering having a child/children in the future (n, %)</b>                                                      |                                              |                                             | .000           |
| Yes                                                                                                                  | 116 (8.6%)                                   | 2,313 (4.6%)                                |                |
| No                                                                                                                   | 1,154 (85.1%)                                | 46,258 (92.3%)                              |                |
| Not sure                                                                                                             | 86 (6.3%)                                    | 1,539 (3.1%)                                |                |
| No response                                                                                                          | 0 (0.0%)                                     | 6 (0.0%)                                    |                |
| <b>Would like to discuss fertility-related issues with a specialist (n, %)</b>                                       |                                              |                                             | .000           |
| Yes                                                                                                                  | 64 (4.7%)                                    | 1,258 (2.5%)                                |                |
| No                                                                                                                   | 1,216 (89.7%)                                | 47,309 (94.4%)                              |                |
| Not sure                                                                                                             | 76 (5.6%)                                    | 1,543 (3.1%)                                |                |
| No response                                                                                                          | 0 (0.0%)                                     | 6 (0.0%)                                    |                |
| <b>Have concerns that may interfere with my ability to seek care at Moffitt (n, %)</b>                               |                                              |                                             | .000           |
| Yes                                                                                                                  | 291 (21.5%)                                  | 8,355 (16.7%)                               |                |
| No                                                                                                                   | 1,065 (78.5%)                                | 41,755 (83.3%)                              |                |
| No response                                                                                                          | 0 (0.0%)                                     | 6 (0.0%)                                    |                |
| <b>Quality of life</b>                                                                                               |                                              |                                             |                |
| <b>ECOG Performance Status Scale (n, %)</b>                                                                          |                                              |                                             | .088           |
| Fully active                                                                                                         | 750 (55.3%)                                  | 28,015 (55.9%)                              |                |
| Restricted in physically strenuous activity but ambulatory and able to carry out work of a light or sedentary nature | 383 (28.2%)                                  | 14,452 (28.8%)                              |                |
| Ambulatory and capable of all self-care but unable to carry out any work activities                                  | 161 (11.9%)                                  | 4,903 (9.8%)                                |                |
| Capable of only limited self-care                                                                                    | 56 (4.1%)                                    | 2,494 (5.0%)                                |                |
| Completely disabled                                                                                                  | 6 (0.4%)                                     | 252 (0.5%)                                  |                |
| <b>SF-12 (M, SD)</b>                                                                                                 |                                              |                                             |                |
| <b>MCS-12<sup>¶</sup></b>                                                                                            | 46.5 (10.9)                                  | 49.5 (10.3)                                 | <.001          |
| <b>Vitality<sup>¶</sup></b>                                                                                          | 44.1 (28.8)                                  | 47.8 (29.0)                                 | <.001          |
| <b>Social functioning<sup>¶</sup></b>                                                                                | 65.0 (32.6)                                  | 71.2 (31.9)                                 | <.001          |

|                                   |             |             |       |
|-----------------------------------|-------------|-------------|-------|
| Role-emotional <sup>¶</sup>       | 70.4 (40.6) | 77.0 (37.7) | <.001 |
| Mental health <sup>¶</sup>        | 62.3 (22.8) | 68.0 (22.2) | <.001 |
| <b>PCS-12<sup>¶</sup></b>         | 42.6 (12.8) | 42.3 (12.8) | .344  |
| Physical functioning <sup>¶</sup> | 65.0 (37.4) | 63.3 (38.0) | .094  |
| Role-physical <sup>¶</sup>        | 52.1 (46.9) | 52.9 (47.5) | .522  |
| Bodily pain <sup>¶</sup>          | 65.5 (33.2) | 68.8 (32.4) | <.001 |
| General health <sup>¶</sup>       | 55.4 (27.1) | 57.1 (27.5) | .026  |

Note. <sup>a</sup> Excludes Straight or Heterosexual, Transgender Female or Trans Woman, Transgender Male or Trans Man, and Genderqueer (Nonbinary) or Additional gender category (open-ended response). <sup>¶</sup> Statistically significant difference between SGM and non-SGM patients when controlling for age, ethnicity, and race, as compared to the non-SGM individuals.

ECOG = Eastern Cooperative Oncology Group; MCS-12 = Mental Component Summary; PCS-12: Physical Component Summary. MCS-12 and PCS-12 scores have a normal distribution of M=50, SD=10. SF-12 subscale scores were transformed to a 0 to 100 scale.

Supplementary Table 2. Psychosocial concerns and quality of life among Bisexual vs Lesbian/Gay/Homosexual

| <b>Variable</b>                                                                                                      | <b>Bisexual patients (n=262)</b> | <b>Lesbian/Gay/Homosexual patients (n=1,087)</b> | <b>p-value</b> |
|----------------------------------------------------------------------------------------------------------------------|----------------------------------|--------------------------------------------------|----------------|
| <b>Psychosocial concerns</b>                                                                                         |                                  |                                                  |                |
| <b>Have a family member or friend who can help during my illness and treatment (n, %)</b>                            |                                  |                                                  | .028           |
| Yes                                                                                                                  | 244 (93.1%)                      | 1,046 (96.2%)                                    |                |
| No                                                                                                                   | 18 (6.9%)                        | 41 (3.8%)                                        |                |
| <b>Living alone (n, %)</b>                                                                                           |                                  |                                                  | .472           |
| Yes                                                                                                                  | 46 (17.6%)                       | 212 (19.5%)                                      |                |
| No                                                                                                                   | 216 (82.4%)                      | 875 (80.5%)                                      |                |
| <b>Considering having a child/children in the future (n, %)</b>                                                      |                                  |                                                  | .000           |
| Yes                                                                                                                  | 47 (17.9%)                       | 67 (6.2%)                                        |                |
| No                                                                                                                   | 186 (71.0%)                      | 961 (88.4%)                                      |                |
| Not sure                                                                                                             | 29 (11.1%)                       | 59 (5.4%)                                        |                |
| <b>Would like to discuss fertility-related issues with a specialist (n, %)</b>                                       |                                  |                                                  | .000           |
| Yes                                                                                                                  | 23 (8.8%)                        | 37 (3.4%)                                        |                |
| No                                                                                                                   | 208 (79.4%)                      | 1,004 (92.4%)                                    |                |
| Not sure                                                                                                             | 31 (11.8%)                       | 46 (4.2%)                                        |                |
| <b>Have concerns that may interfere with my ability to seek care at Moffitt (n, %)</b>                               |                                  |                                                  | .022           |
| Yes                                                                                                                  | 70 (26.7%)                       | 220 (20.2%)                                      |                |
| No                                                                                                                   | 192 (73.3%)                      | 867 (79.8%)                                      |                |
| <b>Quality of life</b>                                                                                               |                                  |                                                  |                |
| <b>ECOG Performance Status Scale (n, %)</b>                                                                          |                                  |                                                  | .921           |
| Fully active                                                                                                         | 142 (54.2%)                      | 599 (55.1%)                                      |                |
| Restricted in physically strenuous activity but ambulatory and able to carry out work of a light or sedentary nature | 80 (30.5%)                       | 306 (28.2%)                                      |                |
| Ambulatory and capable of all self-care but unable to carry out any work activities                                  | 30 (11.5%)                       | 130 (12.0%)                                      |                |
| Capable of only limited self-care                                                                                    | 9 (3.4%)                         | 47 (4.3%)                                        |                |
| Completely disabled                                                                                                  | 1 (0.4%)                         | 5 (0.5%)                                         |                |
| <b>SF-12 (M, SD)</b>                                                                                                 |                                  |                                                  |                |
| MCS-12 <sup>¶</sup>                                                                                                  | 42.4 (11.5)                      | 47.5 (10.5)                                      | <.001          |
| Vitality <sup>¶</sup>                                                                                                | 37.1 (27.6)                      | 45.8 (28.8)                                      | <.001          |
| Social functioning <sup>¶</sup>                                                                                      | 55.1 (32.3)                      | 67.3 (32.2)                                      | <.001          |
| Role-emotional <sup>¶</sup>                                                                                          | 58.2 (43.3)                      | 73.4 (39.2)                                      | <.001          |
| Mental health <sup>¶</sup>                                                                                           | 56.3 (23.3)                      | 63.9 (22.4)                                      | <.001          |
| <b>PCS-12</b>                                                                                                        | 42.1 (12.7)                      | 42.7 (12.8)                                      | .520           |

|                                   |             |             |      |
|-----------------------------------|-------------|-------------|------|
| Physical functioning <sup>¶</sup> | 63.2 (37.4) | 65.3 (37.4) | .414 |
| Role-physical <sup>¶</sup>        | 46.0 (46.5) | 53.3 (47.0) | .024 |
| Bodily pain                       | 62.1 (32.6) | 66.2 (33.3) | .077 |
| General health                    | 53.1 (27.1) | 56.1 (27.0) | .116 |

Note. <sup>¶</sup> Statistically significant difference between SGM and non-SGM patients when controlling for age, ethnicity, and race, as compared to the non-SGM individuals.

ECOG = Eastern Cooperative Oncology Group; MCS-12 = Mental Component Summary; PCS-12: Physical Component Summary. MCS-12 and PCS-12 scores have a normal distribution of M=50, SD=10. SF-12 subscale scores were transformed to a 0 to 100 scale.

Supplementary Table 3. Psychosocial concerns and quality of life among Bisexual vs Non-SGM patients.

| <b>Variable</b>                                                                                                      | <b>Bisexual patients (n=262)</b> | <b>Non-SGM patients (n=50,116)</b> | <b>p-value</b> |
|----------------------------------------------------------------------------------------------------------------------|----------------------------------|------------------------------------|----------------|
| <b>Psychosocial concerns</b>                                                                                         |                                  |                                    |                |
| <b>Have a family member or friend who can help during my illness and treatment (n, %)</b>                            |                                  |                                    | .000           |
| Yes                                                                                                                  | 244 (93.1%)                      | 48,782 (97.3%)                     |                |
| No                                                                                                                   | 18 (6.9%)                        | 1,324 (2.6%)                       |                |
| No response                                                                                                          | 0 (0.0%)                         | 10 (0.0%)                          |                |
| <b>Living alone (n, %)</b>                                                                                           |                                  |                                    | .210           |
| Yes                                                                                                                  | 46 (17.6%)                       | 6,921 (13.8%)                      |                |
| No                                                                                                                   | 216 (82.4%)                      | 43,185 (86.2%)                     |                |
| No response                                                                                                          | 0 (0.0%)                         | 10 (0.0%)                          |                |
| <b>Considering having a child/children in the future (n, %)</b>                                                      |                                  |                                    | .000           |
| Yes                                                                                                                  | 47 (17.9%)                       | 2,313 (4.6%)                       |                |
| No                                                                                                                   | 186 (71.0%)                      | 46,258 (92.3%)                     |                |
| Not sure                                                                                                             | 29 (11.1%)                       | 1,539 (3.1%)                       |                |
| No response                                                                                                          | 0 (0.0%)                         | 6 (0.0%)                           |                |
| <b>Would like to discuss fertility-related issues with a specialist (n, %)</b>                                       |                                  |                                    | .000           |
| Yes                                                                                                                  | 23 (8.8%)                        | 1,258 (2.5%)                       |                |
| No                                                                                                                   | 208 (79.4%)                      | 47,309 (94.4%)                     |                |
| Not sure                                                                                                             | 31 (11.8%)                       | 1,543 (3.1%)                       |                |
| No response                                                                                                          | 0 (0.0%)                         | 6 (0.0%)                           |                |
| <b>Have concerns that may interfere with my ability to seek care at Moffitt (n, %)</b>                               |                                  |                                    | .000           |
| Yes                                                                                                                  | 70 (26.7%)                       | 8,355 (16.7%)                      |                |
| No                                                                                                                   | 192 (73.3%)                      | 41,755 (83.3%)                     |                |
| No response                                                                                                          | 0 (0.0%)                         | 6 (0.0%)                           |                |
| <b>Quality of life</b>                                                                                               |                                  |                                    |                |
| <b>ECOG Performance Status Scale (n, %)</b>                                                                          |                                  |                                    | .652           |
| Fully active                                                                                                         | 142 (54.2%)                      | 28,015 (55.9%)                     |                |
| Restricted in physically strenuous activity but ambulatory and able to carry out work of a light or sedentary nature | 80 (30.5%)                       | 14,452 (28.8%)                     |                |
| Ambulatory and capable of all self-care but unable to carry out any work activities                                  | 30 (11.5%)                       | 4,903 (9.8%)                       |                |
| Capable of only limited self-care                                                                                    | 9 (3.4%)                         | 2,494 (5.0%)                       |                |
| Completely disabled                                                                                                  | 1 (0.4%)                         | 252 (0.5%)                         |                |
| <b>SF-12 (M, SD)</b>                                                                                                 |                                  |                                    |                |
| MCS-12 <sup>¶</sup>                                                                                                  | 42.4 (11.5)                      | 49.5 (10.3)                        | <.001          |
| Vitality <sup>¶</sup>                                                                                                | 37.1 (27.6)                      | 47.8 (29.0)                        | <.001          |
| Social functioning <sup>¶</sup>                                                                                      | 55.1 (32.3)                      | 71.2 (31.9)                        | <.001          |
| Role-emotional <sup>¶</sup>                                                                                          | 58.2 (43.3)                      | 77.0 (37.7)                        | <.001          |

|                                   |             |             |       |
|-----------------------------------|-------------|-------------|-------|
| Mental health <sup>¶</sup>        | 56.3 (23.3) | 68.0 (22.2) | <.001 |
| <b>PCS-12<sup>¶</sup></b>         | 42.1 (12.7) | 42.3 (12.8) | .809  |
| Physical functioning <sup>¶</sup> | 63.2 (37.4) | 63.3 (38.0) | .970  |
| Role-physical <sup>¶</sup>        | 46.0 (46.5) | 52.9 (47.5) | .019  |
| Bodily pain <sup>¶</sup>          | 62.1 (32.6) | 68.8 (32.4) | .001  |
| General health <sup>¶</sup>       | 53.1 (27.1) | 57.1 (27.5) | .019  |

Note. <sup>¶</sup> Statistically significant difference between SGM and non-SGM patients when controlling for age, ethnicity, and race, as compared to the non-SGM individuals.

ECOG = Eastern Cooperative Oncology Group; MCS-12 = Mental Component Summary; PCS-12: Physical Component Summary. MCS-12 and PCS-12 scores have a normal distribution of M=50, SD=10. SF-12 subscale scores were transformed to a 0 to 100 scale.

Supplementary Table 4. T-Test results: Age difference within total and subsamples. (Total N=51,503; SGM N=1,387; Non-SGM=50,116)

| Group                                                                    | Yes (1)     | No (2)      | Not sure (3) | <i>p</i> -value<br>(Comparison pair: 1-2; 1-3; 2-3) |
|--------------------------------------------------------------------------|-------------|-------------|--------------|-----------------------------------------------------|
| Considering having a child/children in the future (M, SD)                |             |             |              |                                                     |
| Total Sample                                                             | 30.4 (8.3)  | 62.9 (12.6) | 38.1 (12.4)  | <.001, <.001, <.001                                 |
| SGM                                                                      | 28.0 (6.3)  | 57.1 (13.4) | 32.4 (11.1)  | <.001, <.01, <.001                                  |
| Non-SGM                                                                  | 30.6 (8.4)  | 63.1 (12.5) | 38.5 (12.4)  | <.001, <.001, <.001                                 |
| Would like to discuss fertility-related issues with a specialist (M, SD) |             |             |              |                                                     |
| Total Sample                                                             | 34.6 (11.4) | 62.0 (13.6) | 39.3 (14.8)  | <.001, <.001, <.001                                 |
| SGM                                                                      | 30.6 (8.5)  | 55.4 (14.7) | 32.7 (12.9)  | <.001, .256, <.001                                  |
| Non-SGM                                                                  | 34.8 (11.5) | 62.2 (13.5) | 39.6 (14.8)  | <.001, <.001, <.001                                 |

Supplementary Table 5. Comparison of the demographics in the US, catchment area and the study sample.

|                                                                     | <b>United States</b><br><b>N=327,167,439</b> | <b>Catchment</b><br><b>Area</b><br><b>N=6,145,524</b> | <b>Study</b><br><b>Sample:</b><br><b>SGM</b><br><b>N=1,387</b> | <b>Study</b><br><b>Sample:</b><br><b>Non-SGM</b><br><b>N=50,116</b> |
|---------------------------------------------------------------------|----------------------------------------------|-------------------------------------------------------|----------------------------------------------------------------|---------------------------------------------------------------------|
| <b>Race</b>                                                         |                                              |                                                       |                                                                |                                                                     |
| Asian American or Pacific Islander/<br>American Indian <sup>a</sup> | 5.8%                                         | 2.6%                                                  | 1.7%                                                           | 1.9%                                                                |
| Black/African American                                              | 12.7%                                        | 10.6%                                                 | 4.4%                                                           | 5.1%                                                                |
| Non-Hispanic White                                                  | 60.2%                                        | 67.4%                                                 | 74.5%                                                          | 76.4%                                                               |
| <b>Ethnicity:</b> Hispanic/Latinx                                   | 18.3%                                        | 17.7%                                                 | 11.7%                                                          | 8.5%                                                                |
| <b>Age</b>                                                          |                                              |                                                       |                                                                |                                                                     |
| 10-19 Years <sup>b</sup>                                            | 13.1%                                        | 10.9%                                                 | 0.9%                                                           | 0.4%                                                                |
| 20-64 Years                                                         | - <sup>c</sup>                               | 54.7%                                                 | 72.7%                                                          | 52.8%                                                               |
| 65 Years +                                                          | 16.0%                                        | 24.1%                                                 | 26.3%                                                          | 46.8%                                                               |
| <b>Gender</b>                                                       |                                              |                                                       |                                                                |                                                                     |
| Female                                                              | 50.8%                                        | 51.3%                                                 | 41.6%                                                          | 40.7%                                                               |
| <b>LGBT</b> <sup>d</sup>                                            | 7.2%                                         | 4.1%                                                  | 2.7%                                                           | -                                                                   |

Note. <sup>a</sup> USA/Catchment area includes Asian American or Pacific Islander whereas the study sample includes Asian American or American Indian. <sup>b</sup> USA/Catchment area includes individuals 10-19 years whereas the study sample includes 18-19 years. <sup>c</sup> Data unavailable. <sup>d</sup> USA is based on the Gallup results in 2023.<sup>3</sup> USA/Catchment area includes LGBT. Catchment area includes LGBT in Tampa Bay (4 counties) only. The study sample includes LGBT+.



Supplementary Table 6. Psychosocial concerns and quality of life among those who were exposed to the Sexual Orientation (SO) question only. (N=14,741)

| <b>Variable</b>                                                                                                      | <b>SGM patients<br/>(n=352)</b> | <b>Non-SGM<br/>(n=14,389)</b> | <b>p-value</b> |
|----------------------------------------------------------------------------------------------------------------------|---------------------------------|-------------------------------|----------------|
| <b>Psychosocial concerns</b>                                                                                         |                                 |                               |                |
| <b>Have a family member or friend who can help during my illness and treatment (n, %)</b>                            |                                 |                               | .021           |
| Yes                                                                                                                  | 335 (95.2%)                     | 14027 (97.5%)                 |                |
| No                                                                                                                   | 17 (4.8%)                       | 358 (2.5%)                    |                |
| No response                                                                                                          | 0 (0.0%)                        | 4 (0.0%)                      |                |
| <b>Living alone (n, %)</b>                                                                                           |                                 |                               | <.001          |
| Yes                                                                                                                  | 79 (22.4%)                      | 1898 (13.2%)                  |                |
| No                                                                                                                   | 273 (77.6%)                     | 12487 (86.8%)                 |                |
| No response                                                                                                          | 0 (0.0%)                        | 4 (0.0%)                      |                |
| <b>Considering having a child/children in the future (n, %)</b>                                                      |                                 |                               | <.01           |
| Yes                                                                                                                  | 29 (8.2%)                       | 669 (4.6%)                    |                |
| No                                                                                                                   | 308 (87.5%)                     | 13268 (92.2%)                 |                |
| Not sure                                                                                                             | 15 (4.3%)                       | 452 (3.1%)                    |                |
| <b>Would like to discuss fertility-related issues with a specialist (n, %)</b>                                       |                                 |                               | .020           |
| Yes                                                                                                                  | 13 (3.7%)                       | 415 (2.9%)                    |                |
| No                                                                                                                   | 319 (90.6%)                     | 13517 (93.9%)                 |                |
| Not sure                                                                                                             | 20 (5.7%)                       | 457 (3.2%)                    |                |
| <b>Have concerns that may interfere with my ability to seek care at Moffitt (n, %)</b>                               |                                 |                               | .042           |
| Yes                                                                                                                  | 80 (22.7%)                      | 2525 (17.5%)                  |                |
| No                                                                                                                   | 272 (77.3%)                     | 11863 (82.4%)                 |                |
| No response                                                                                                          | 0 (0.0%)                        | 1 (0.0%)                      |                |
| <b>Quality of life</b>                                                                                               |                                 |                               |                |
| <b>ECOG Performance Status Scale (n, %)</b>                                                                          |                                 |                               | .760           |
| Fully active                                                                                                         | 199 (56.5%)                     | 8255 (57.4%)                  |                |
| Restricted in physically strenuous activity but ambulatory and able to carry out work of a light or sedentary nature | 96 (27.3%)                      | 4059 (28.2%)                  |                |
| Ambulatory and capable of all self-care but unable to carry out any work activities                                  | 41 (11.6%)                      | 1380 (9.6%)                   |                |
| Capable of only limited self-care                                                                                    | 15 (4.3%)                       | 631 (4.4%)                    |                |
| Completely disabled                                                                                                  | 1 (0.3%)                        | 64 (0.4%)                     |                |
| <b>SF-12 (M, SD)</b>                                                                                                 |                                 |                               |                |
| <b>MCS-12<sup>¶</sup></b>                                                                                            | 47.2 (10.8)                     | 49.5 (10.2)                   | <.001          |
| <b>Vitality<sup>¶</sup></b>                                                                                          | 44.2 (27.9)                     | 48.3 (28.9)                   | <.001          |
| <b>Social functioning<sup>¶</sup></b>                                                                                | 67.7 (32.3)                     | 71.9 (31.3)                   | <.001          |

|                            |             |             |       |
|----------------------------|-------------|-------------|-------|
| Role-emotional             | 73.4 (39.9) | 76.7 (37.8) | .104  |
| Mental health <sup>¶</sup> | 62.4 (22.5) | 68.0 (22.0) | <.001 |
| <b>PCS-12</b>              | 42.7 (12.8) | 42.7 (12.7) | .999  |
| Physical functioning       | 66.5 (36.5) | 64.4 (37.8) | .311  |
| Role-physical <sup>¶</sup> | 51.3 (46.4) | 53.5 (47.4) | .386  |
| Bodily pain <sup>¶</sup>   | 65.9 (32.7) | 69.4 (32.2) | .043  |
| General health             | 56.3 (26.6) | 58.1 (27.4) | .235  |

Note. <sup>¶</sup> Statistically significant difference between SGM and non-SGM patients when controlling for age, ethnicity, and race, as compared to the non-SGM individuals.

ECOG = Eastern Cooperative Oncology Group; MCS-12 = Mental Component Summary; PCS-12: Physical Component Summary. MCS-12 and PCS-12 scores have a normal distribution of M=50, SD=10. SF-12 subscale scores were transformed to a 0 to 100 scale.
